# Supplementary material for: Inhibition of mTOR prevents glucotoxicity-mediated increase of SA-beta-gal, p16INK4a, and insulin hypersecretion, without restoring electrical features of mouse pancreatic islets
Source: PubMed Central journal article supplement (PMC11374829; doi:10.1007/s10522-024-10107-9), 2024-05-15
Supplement: 10522_2024_10107_MOESM1_ESM.pdf [file 10522_2024_10107_MOESM1_ESM.pdf]

**Supplementary material:**

**Inhibition of mTOR prevents glucotoxicity-mediated increase of SA-beta-gal, p16<sup>INK4a</sup>, and insulin hypersecretion, without restoring electrical features of mouse pancreatic islets**

**Tereso J. Guzmán<sup>1,2,\*</sup>, Nina Klöpper<sup>1</sup>, Carmen M. Gurrola-Díaz<sup>2</sup>, Martina Düfer<sup>1,\*</sup>**

<sup>1</sup> University of Münster, Institute of Pharmaceutical and Medicinal Chemistry, Department of Pharmacology, Corrensstraße 48, 48149 Münster, Germany.

<sup>2</sup> Universidad de Guadalajara, Instituto de Investigación en Enfermedades Crónico-Degenerativas, Departamento de Biología Molecular y Genómica, Centro Universitario de Ciencias de la Salud, 44340 Guadalajara, Jalisco, México.

**\*Corresponding authors:**

Prof. Dr. Martina Düfer

Address: Corrensstraße 48, 48149 Münster, Germany. Tel.: +49 251 83 33339, Fax: +49 251 83 32144. E-mail: [martina.duefer@uni-muenster.de](mailto:martina.duefer@uni-muenster.de),

ORCID: <https://orcid.org/0000-0003-1572-9235>

Dr. Tereso J. Guzmán

Address: Corrensstraße 48, 48149 Münster, Germany. Tel.: +49 251 83 33371.

E-mail: [goozman57@hotmail.com](mailto:goozman57@hotmail.com), ORCID: <https://orcid.org/0000-0002-1900-5931>

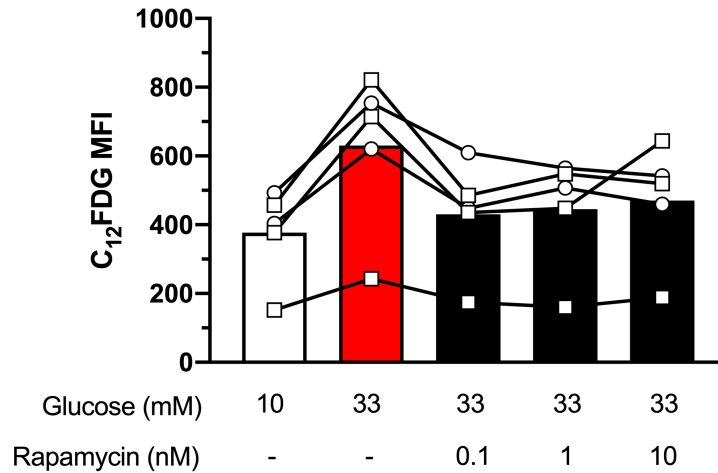

**Fig S1.** Raw C<sub>12</sub>FDG fluorescence values in pancreatic islet cells exposed to glucotoxicity in the presence of rapamycin or vehicle. After 72 h of incubation under the indicated conditions, the level of SA-beta-gal activity was assessed with the fluorogenic substrate C<sub>12</sub>FDG. The number of independent female and male mouse preparations is indicated by the circles and squares, respectively. The lines correlate the outcome in every condition by experiment. MFI: mean fluorescence intensity.

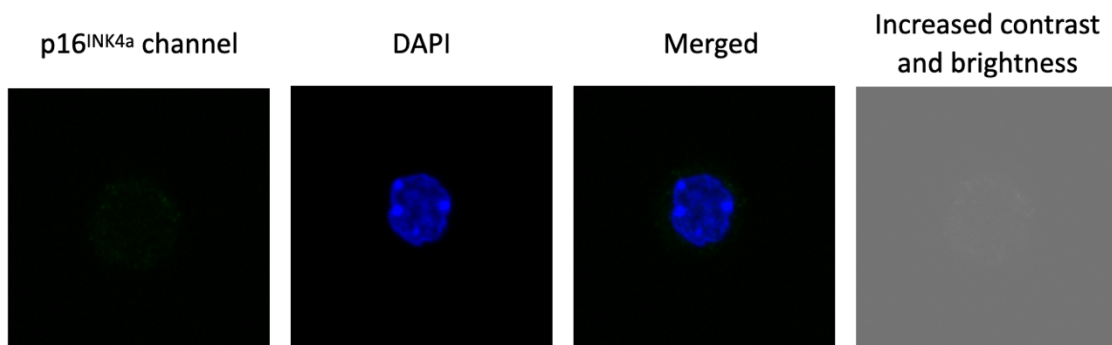

**Fig S2.** p16<sup>INK4a</sup> immunostaining negative control in mouse pancreatic islet cells. The cells were stained with the standardized immunostaining protocol for p16<sup>INK4a</sup>, replacing the primary antibody with blocking solution (10% goat serum). For counterstaining, the nuclei were revealed with DAPI and images were acquired with a confocal microscope.

**Table S1.** Primers employed for gene expression analyses by RT-qPCR.

| <b>Gene</b>   | <b>Primer</b> | <b>5'-3' nucleotide sequence</b> |
|---------------|---------------|----------------------------------|
| <i>Vamp2</i>  | Forward       | GTTTGCTTCCCTTACCCCGT             |
|               | Reverse       | CAGTTGAGTGCCCCACATGA             |
| <i>Snapin</i> | Forward       | TCTCCAAGCAAATAAGCACGG            |
|               | Reverse       | AACAAAACCCAAAAGGTAGAGGC          |
| <i>Snap23</i> | Forward       | GTCCGAGAACTGTGGAGGCT             |
|               | Reverse       | GGATACTCTGTCCCGCTGACTA           |
| <i>Snap25</i> | Forward       | TGTGCTGTCTTTGGTTCCTCA            |
|               | Reverse       | GCAGGTTTTGCTGGTATGACT            |
| <i>Syt1</i>   | Forward       | GCCCGACAAAAAGAAGAAGTT            |
|               | Reverse       | CCGAGTATGGCACCTTGAAA             |
| <i>Vamp7</i>  | Forward       | ACCTTCGCCCCTCAGTCAATA            |
|               | Reverse       | CCCTGGCAACAACAGCAAAAAG           |
| <i>Actb</i>   | Forward       | TCGTACTCCTGCTTGCTGAT             |
|               | Reverse       | AGATTACTGCTCTGGCTCCTA            |

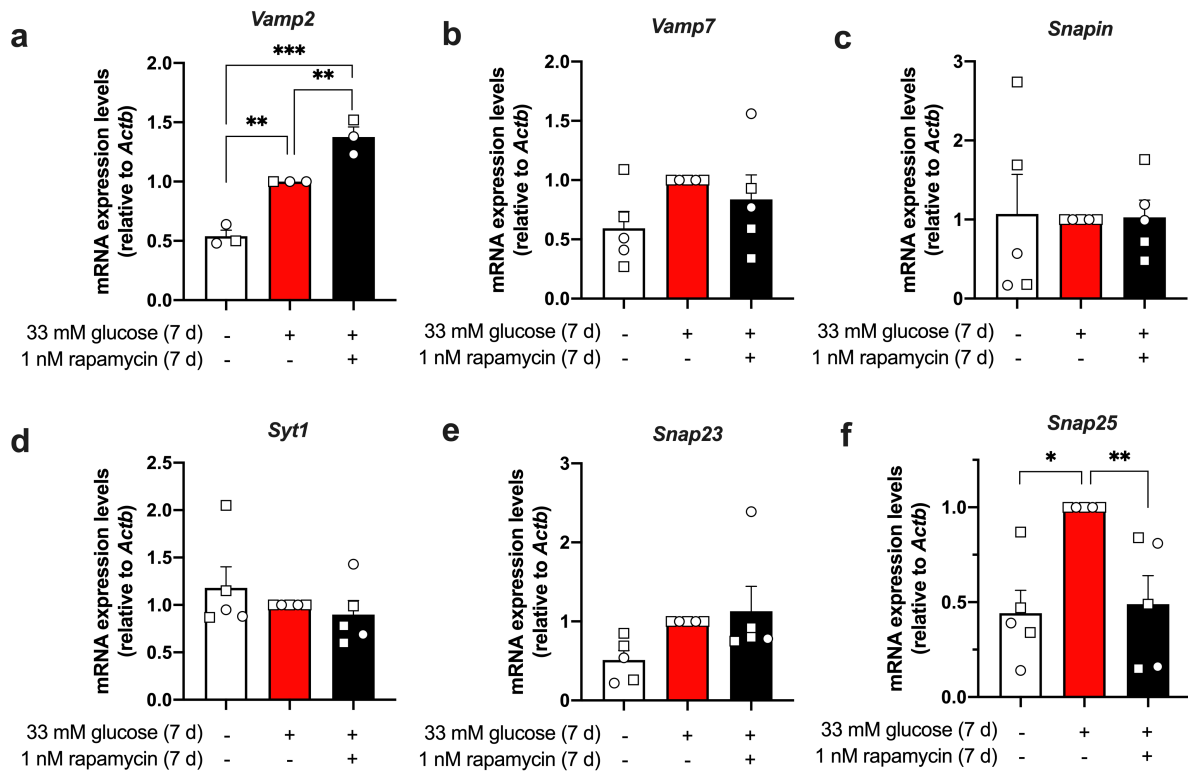

**Fig S3.** Gene expression analysis of exocytosis-related genes in mouse pancreatic islet cells exposed to glucotoxicity in the presence or absence of rapamycin for 7 d. We compared the gene expression of *Vamp2* (a), *Vamp7* (b), *Snapin* (c), *Syt1* (d), *Snap23* (e) and *Snap25* (f) using the gene expression under glucotoxic conditions (red bars) as reference mRNA expression levels. The treatment with 1 nM rapamycin (black bars) in the presence of glucotoxicity, modulated the gene expression of *Vamp2* and *Snap25*, promoting a significant upregulation and downregulation, respectively. *Actb* was used as a housekeeping gene for the expression analyses. The number of independent male and female mouse preparations is indicated by the squares and circles, respectively. \* $p < 0.05$ ; \*\* $p < 0.01$ ; \*\*\* $p < 0.001$ .
